# Supplementary material for: Podocyte specific deletion of PKM2 ameliorates LPS-induced podocyte injury through beta-catenin
Source: PubMed Central journal article supplement (PMC9150347; doi:10.1186/s12964-022-00884-6), 2022-05-30
Supplement: 12964_2022_884_MOESM2_ESM.pdf [file 12964_2022_884_MOESM2_ESM.pdf]

A

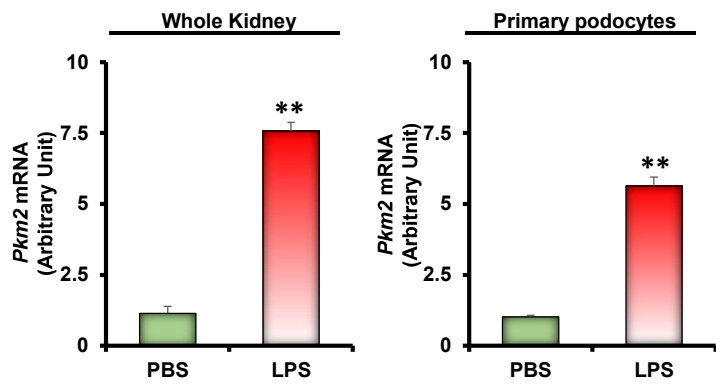

B

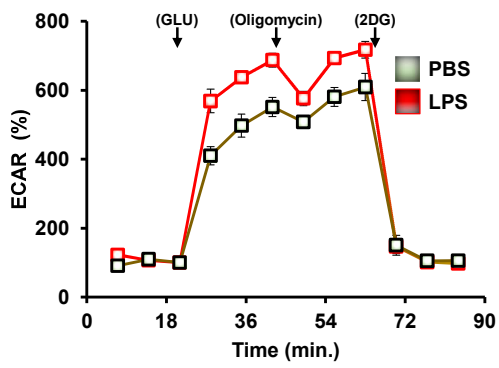

C

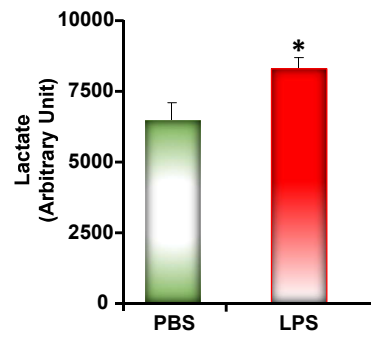

Figure S1

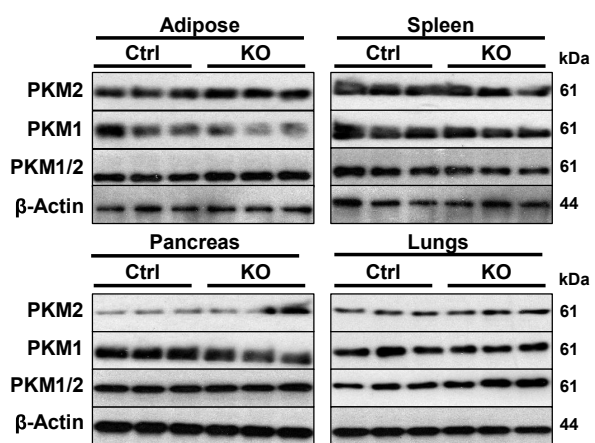

Figure S2

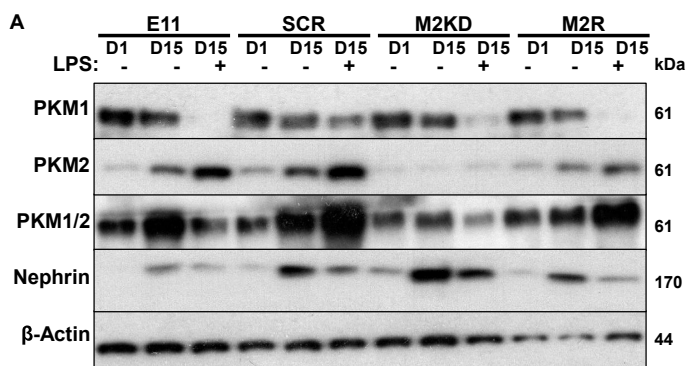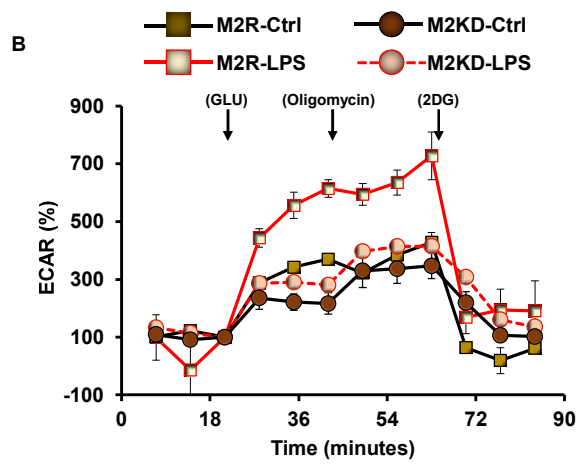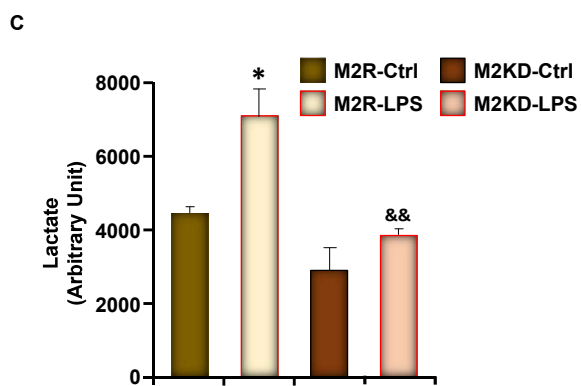

Figure S3
